# Supplementary material
Source: publisher figshare collection journal article supplement (https://acs.figshare.com/ndownloader/files/31403838)
Supplement: Supplementary file 1 [file 31403838]

## Supporting Information

### **A Cost-Effective Alpha-Fluorinated Bithienyl Benzodithiophene Unit for High-Performance Polymer Donor Material**

*Wenqing Zhang<sup>a</sup>, Chenkai Sun<sup>a,e\*</sup>, Shucheng Qin<sup>b,c</sup>, Ziya Shang<sup>b,c</sup>, Shaman Li<sup>c</sup>, Can Zhu<sup>b,c</sup>, Guang Yang<sup>a</sup>, Lei Meng<sup>b,c,\*</sup>, Yongfang Li<sup>b,c,d\*</sup>*

<sup>a</sup> College of Chemistry, and Green Catalysis Center, Zhengzhou University, Zhengzhou 450001, China

<sup>b</sup> Beijing National Laboratory for Molecular Sciences, CAS Key Laboratory of Organic Solids, Institute of Chemistry, Chinese Academy of Sciences, Beijing 100190, China

<sup>c</sup> School of Chemical Science, University of Chinese Academy of Sciences, Beijing 100049, China.

<sup>d</sup> Laboratory of Advanced Optoelectronic Materials, College of Chemistry, Chemical Engineering and Materials Science, Soochow University, Suzhou 215123, China

<sup>e</sup> Key Laboratory of Organic Synthesis of Jiangsu Province, College of Chemistry, Chemical Engineering and Materials Science, Soochow University, Suzhou, 215123, China

\* Corresponding authors

E-mail: schenkai@zzu.edu.cn (Chenkai Sun), menglei@iccas.ac.cn (Lei Meng),

liyf@iccas.ac.cn (Yongfang Li)

## Materials and synthesis

The electron acceptors Y6 and ICBA are purchased from Solarmer Materials Inc and J&K, respectively. Other chemicals and solvents are obtained from J&K, Alfa Aesar, and TCI Chemical Co., etc. All the reagents and commercial compounds are used as received. The synthetic routes of PBQ10 and  $\alpha$ -PBQ10 are shown in **Scheme 1**. The compounds 4-7, monomer BDTT-F, monomer 9, and polymer PBQ10 are synthesized according to the reported literatures.<sup>1-4</sup> The synthetic details of compound 2, compound 3, monomer  $\alpha$ -BDTT-F and polymer  $\alpha$ -PBQ10 are described in the Experimental Section.

## General Characterization

<sup>1</sup>H NMR and <sup>13</sup>C NMR spectra of the corresponding compounds are measured on a Bruker DMX-400 spectrometer using *d*-chloroform as solvent and trimethylsilane as the internal reference. Gel permeation chromatography (GPC) measurements are performed on Agilent PL-GPC 220 instrument with high temperature chromatograph, using 1,2,4-trichlorobenzene as the eluent at 160 °C. UV-visible absorption spectra are measured on a Hitachi U-3010 UV-vis spectrophotometer. Electrochemical cyclic voltammetry is performed on a Zahner IM6e Electrochemical Workstation under a nitrogen atmosphere using three-electrode system with a Pt disk working electrode, an Ag/AgCl reference electrode and a Pt wire counter electrode in acetonitrile solution of tetrabutylammonium hexafluorophosphate (Bu<sub>4</sub>NPF<sub>6</sub>), and ferrocene/ferrocenium (Fc/Fc<sup>+</sup>) redox couple is used as an internal reference. Transmission electron microscope (TEM) measurement was performed on the JEM-ARM2100F Transmission Electron Microscope, with samples prepared under the same condition of the optimal photoactive layer on PEDOT: PSS layer of the devices. Atomic force microscope (AFM) measurement was performed on the Bruker-ICON2-SYS atomic force microscope with samples prepared under the same condition of the optimal photoactive layer on PEDOT: PSS layer of the devices.

## Measurement of charge carrier mobilities

The charge carrier mobilities were measured with the device structure of

ITO/PEDOT:PSS/active layer/MoO<sub>3</sub>/Ag for hole mobility and ITO/ZnO/active layer/PDINN/Ag for electron mobility. The hole and electron mobilities are calculated according to the space-charge-limited current (SCLC) method equation:

$$J = \frac{9\varepsilon_0\varepsilon_r\mu V^2}{8L^3} \quad (S1)$$

Where  $J$  is the current density,  $\varepsilon_0$  is the dielectric constant of empty space,  $\varepsilon_r$  is the relative dielectric constant of active layer materials which is usually 2-4 for organic semiconductors, herein we use a relative dielectric constant of 3,  $\mu$  is the charge mobility,  $V$  is the internal voltage in the device, and  $V = V_{\text{appl}} - V_{\text{bi}} - V_s$ , where  $V_{\text{appl}}$  is the voltage applied to the devices, and  $V_{\text{bi}}$  is the built-in voltage resulting from the relative work function difference between the two electrodes (in the hole-only device, the  $V_{\text{bi}}$  value is 0.2 V),  $V_s$  is the voltage drop from the series resistance and  $L$  is the thickness of the active layers.

### Device fabrication and characterization

The PSCs were fabricated with a structure of ITO/PEDOT:PSS/active layer/PDINN/Ag. The ITO glass was cleaned by sequential ultrasonic treatment in detergent, deionized water, acetone and isopropanol. Then the dried ITO glass was treated with an ultraviolet-ozone chamber (Ultraviolet Ozone Cleaner, Jelight Company, USA) for 25 min. A thin layer of PEDOT: PSS was prepared on precleaned ITO glass through spin-coating a PEDOT: PSS aqueous solution (Baytron P VP AI 4083 from H. C. Starck) at 5000 rpm and dried subsequently at 150 °C for 20 min in the air. The substrates were then transferred into a N<sub>2</sub>-filled glovebox. A blend solution was prepared by dissolving the donor and acceptor in chloroform (CHCl<sub>3</sub>), and then the blend solution was spin-coated at 3000 rpm onto the PEDOT:PSS layer. After spin-coating, the active layers were annealed at 85 °C for 10 min. Then, methanol solution of PDINN at a concentration of 1.0 mg mL<sup>-1</sup> is prepared upon the active layer by spin-coating at 3000 rpm to afford a PDINN cathode buffer layer. Finally, cathode metal Ag was deposited at a pressure of  $1.0 \times 10^{-6}$  Pa. The active layer effective area of the devices was 4.7 mm<sup>2</sup>, which is defined using an optical microscope (Olympus BX51). The current density-voltage ( $J$ - $V$ ) characteristics of the PSCs were measured in a nitrogen glove box with a Keithley 2450 Source Measure unit. Oriel Sol3A Class AAA Solar Simulator (model, Newport 94023A) with a 450W xenon lamp

and an air mass (AM) 1.5 filter was used as the light source. The light intensity was calibrated to  $100 \text{ mW cm}^{-2}$  by a Newport Oriel 91150V reference cell. The input photon to converted current efficiency (IPCE) was measured by Solar Cell Spectral Response Measurement System QE-R3-011 (Enli Technology Co., Ltd., Taiwan). The light intensity at each wavelength was calibrated with a standard single-crystal Si photovoltaic cell.

### **DFT calculation**

All calculations are performed by ORCA (*version 4.2.1*) unless otherwise statement. The conformations are generated by molclus (*version 1.9.4*) and optimized by DFT calculation with a function of wB97X-D3 with a basis set of def2-TZVP. The straight and branched alkyl chains were simplified to methyl and isobutyl, respectively, for saving time. The single point energies and gradients were further calculated with wB97M-V function, the energy levels were calculated with B3LYP function, the dipole moments were calculated with PBE0 function, the basis set were all with def2-TZVP.<sup>5,6</sup> The molecular orbitals and geometries were analyzed by Multiwfn (*version 3.6*) and VMD (*version 1.9.3*) for visualization.<sup>7,8</sup>

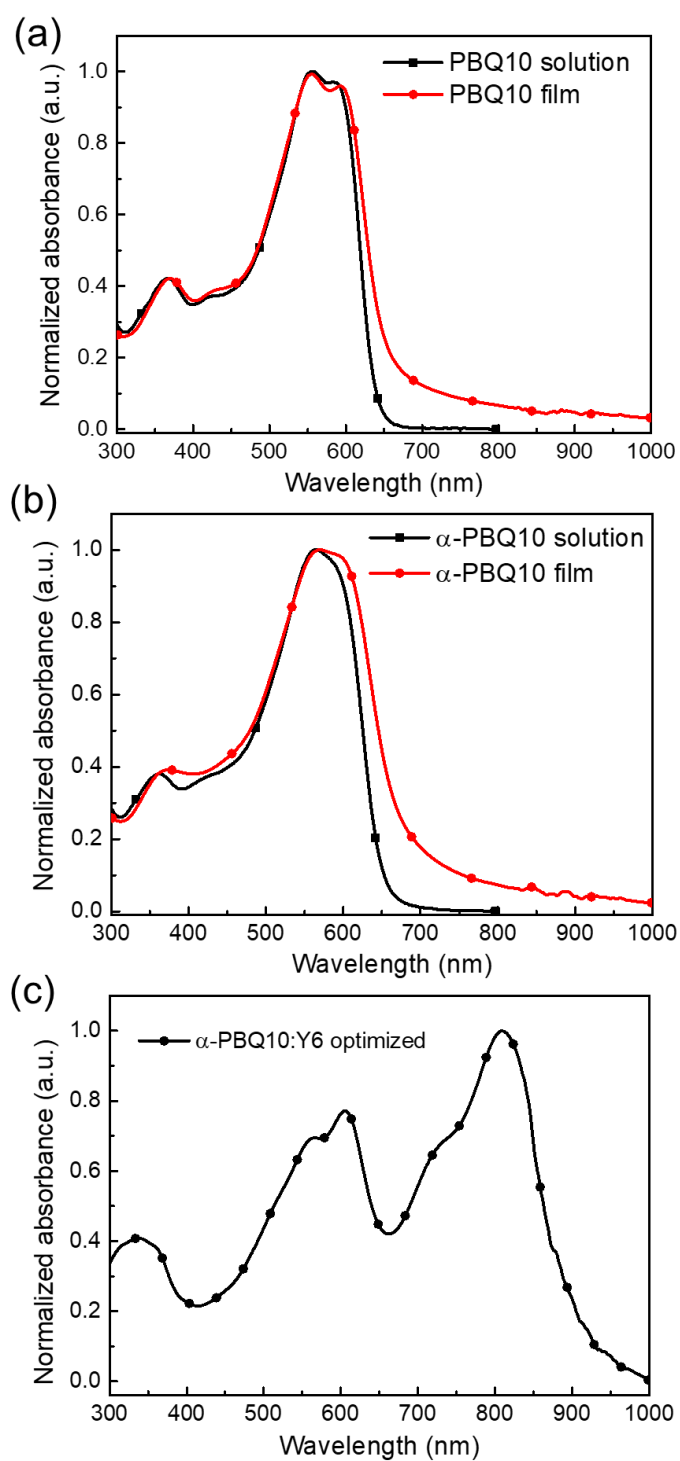

**Figure S1.** Normalized absorption spectra of (a) polymer PBQ10 in the solution and in the film, (b) polymer  $\alpha$ -PBQ10 in the solution and in the film and (c)  $\alpha$ -PBQ10:Y6 film (optimized with 0.5% CN and thermal annealing treatment).

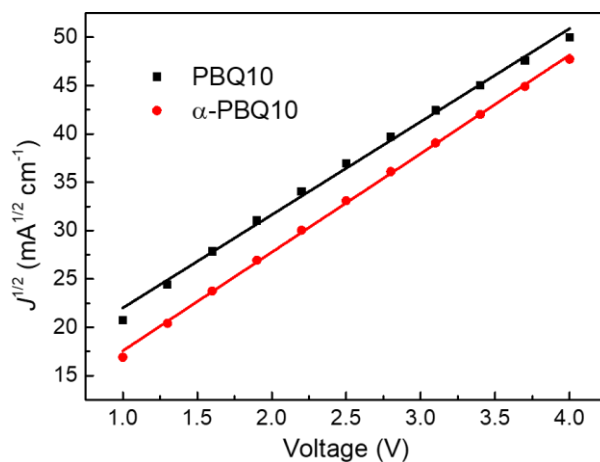

**Figure S2.**  $J^{1/2} \sim V$  ( $V = V_{\text{appl}} - V_{\text{bi}} - V_{\text{s}}$ ) characteristics of the hole-only devices based on polymers PBQ10 and  $\alpha$ -PBQ10.

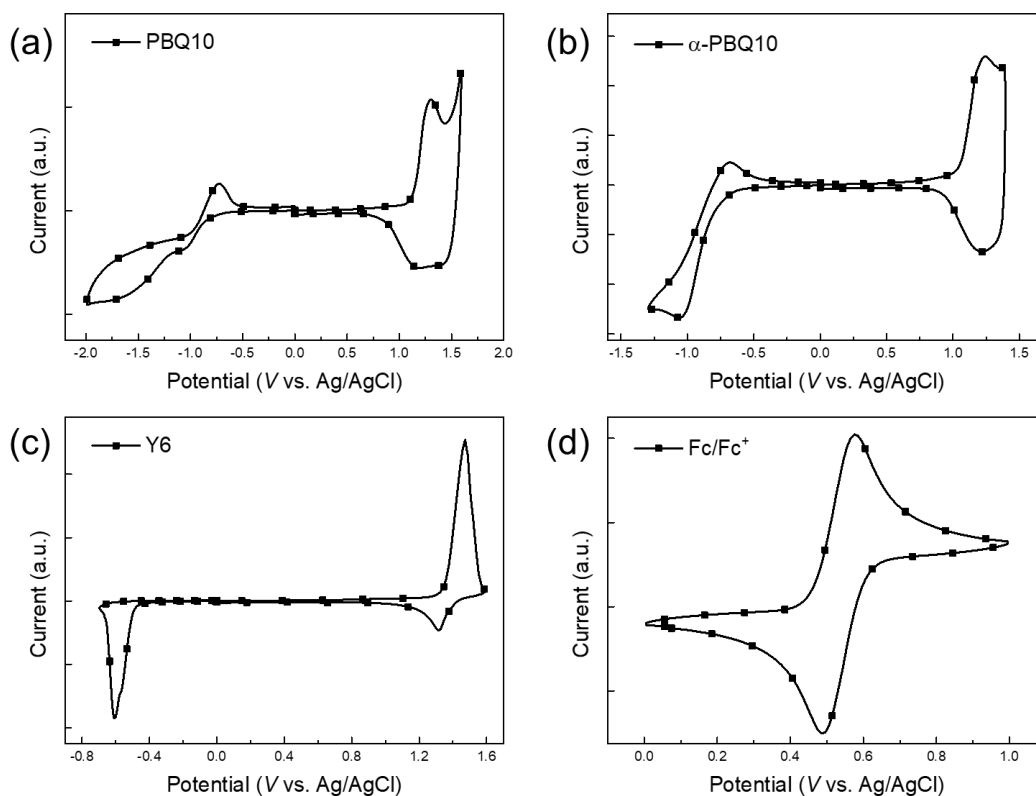

**Figure S3.** Cyclic voltammograms of (a) the polymer PBQ10, (b) the polymer  $\alpha$ -PBQ10, (c) electron acceptor Y6, and (d)  $\text{Fc}/\text{Fc}^+$  measured in  $0.1 \text{ mol L}^{-1} \text{ Bu}_4\text{NPF}_6$  acetonitrile solution at a scan rate of  $20 \text{ mV s}^{-1}$ .

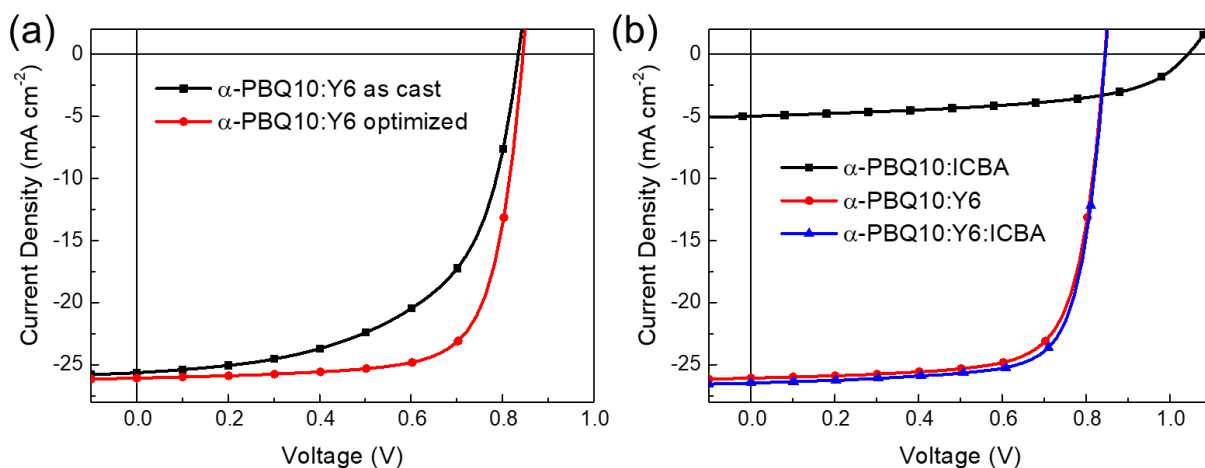

**Figure S4.** *J-V* curves of the devices based on (a)  $\alpha$ -PBQ10:Y6 (as cast and optimized with 0.5% CN and thermal annealing treatment), (b)  $\alpha$ -PBQ10:ICBA,  $\alpha$ -PBQ10:Y6 and  $\alpha$ -PBQ10:Y6:ICBA.

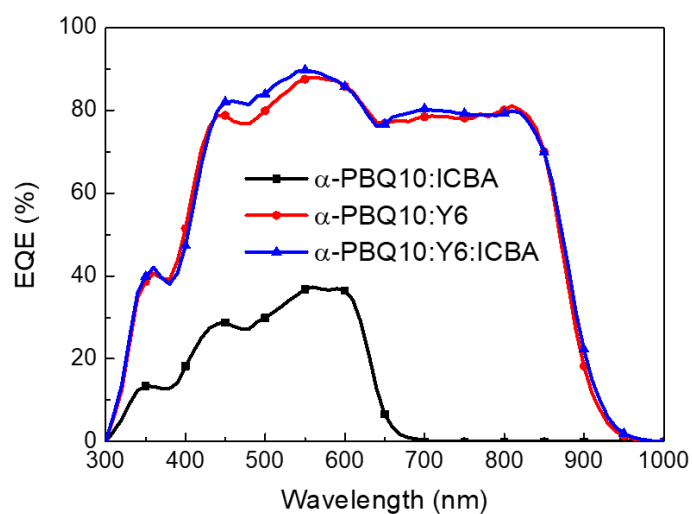

**Figure S5.** EQE spectra of the devices based on  $\alpha$ -PBQ10:ICBA,  $\alpha$ -PBQ10:Y6 and  $\alpha$ -PBQ10:Y6:ICBA.

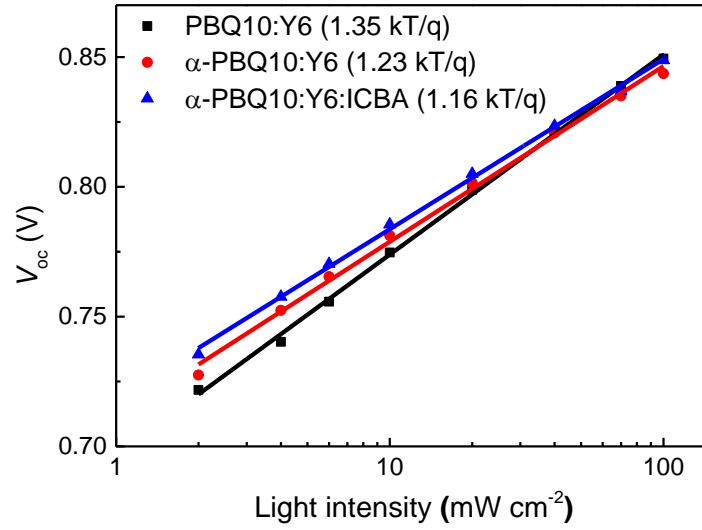

**Figure S6.** Dependence of  $V_{oc}$  on  $P_{light}$  of the binary and ternary devices.

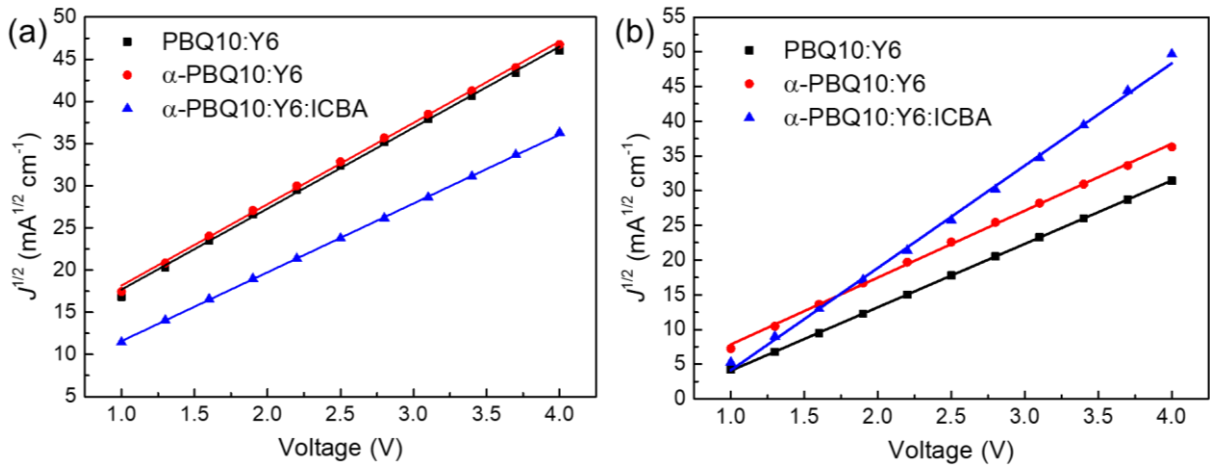

**Figure S7.**  $J^{1/2} \sim V$  ( $V = V_{appl} - V_{bi} - V_s$ ) characteristics of the (a) hole-only devices based on PBQ10:Y6,  $\alpha$ -PBQ10:Y6 and  $\alpha$ -PBQ10:Y6:ICBA (b) electron-only devices based on PBQ10:Y6,  $\alpha$ -PBQ10:Y6 and  $\alpha$ -PBQ10:Y6:ICBA.



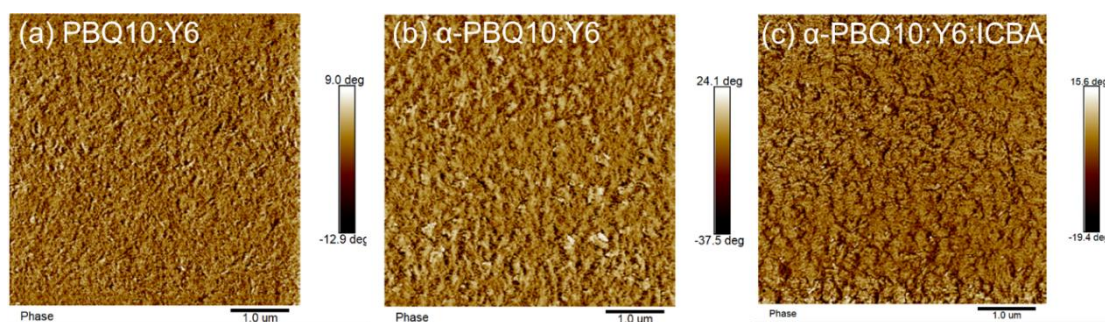

**Figure S8.** AFM phase images of (a) the PBQ10:Y6 blend, (b) the  $\alpha$ -PBQ10:Y6 blend, and (c) the  $\alpha$ -PBQ10:Y6:ICBA blend.

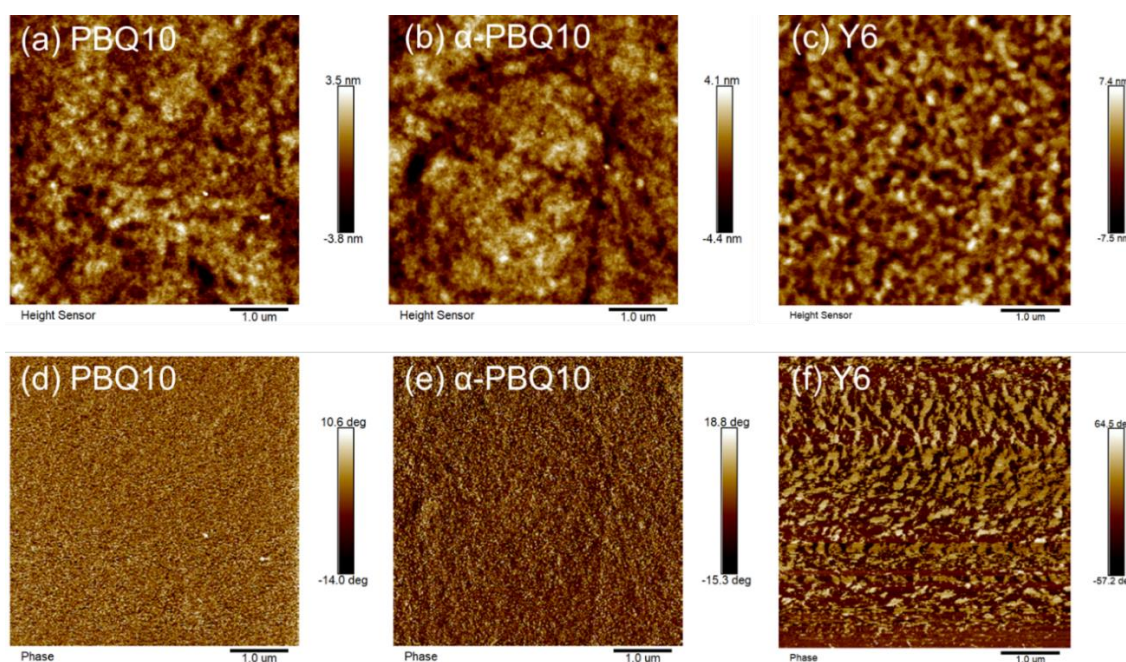

**Figure S9.** AFM (a-c) height images and (d-f) phase images of the PBQ10,  $\alpha$ -PBQ10 and Y6.

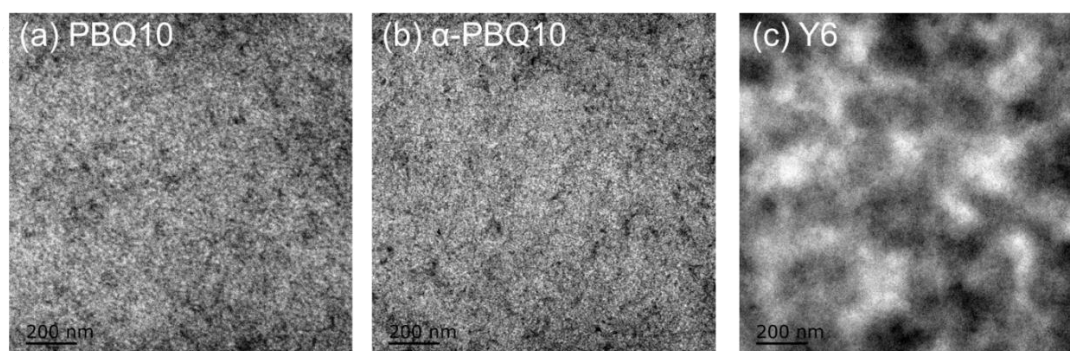

**Figure S10.** TEM images of (a) PBQ10, (b)  $\alpha$ -PBQ10, and (c) Y6.

**Table S1.** Photovoltaic performance parameters of the PSCs based on  $\alpha$ -PBQ10:Y6 with different D: A weight ratio under the illumination of AM 1.5G, 100 mW cm<sup>-2</sup>.

| D/A<br>ratios | $V_{oc}$<br>(V) | $J_{sc}$<br>(mA cm <sup>-2</sup> ) | FF<br>(%) | PCE<br>(%) |
|---------------|-----------------|------------------------------------|-----------|------------|
| 1:1           | 0.843           | 25.65                              | 70.95     | 15.34      |
| 1:1.2         | 0.845           | 26.12                              | 73.65     | 16.26      |
| 1:1.5         | 0.839           | 25.16                              | 67.67     | 14.28      |

**Table S2.** Photovoltaic performance parameters of the PSCs based on  $\alpha$ -PBQ10:Y6 with different 1-CN additive volume ratio under the illumination of AM 1.5G, 100 mW cm<sup>-2</sup>.

| CN<br>(vol %) | $V_{oc}$<br>(V) | $J_{sc}$<br>(mA cm <sup>-2</sup> ) | FF<br>(%) | PCE<br>(%) |
|---------------|-----------------|------------------------------------|-----------|------------|
| 0             | 0.845           | 25.36                              | 58.16     | 12.46      |
| 0.3           | 0.842           | 25.43                              | 66.61     | 14.26      |
| 0.5           | 0.845           | 26.12                              | 73.65     | 16.26      |
| 0.7           | 0.832           | 25.30                              | 73.33     | 15.43      |

**Table S3.** Photovoltaic performance parameters of the PSCs based on  $\alpha$ -PBQ10:Y6 with different annealing temperature for 10 min under the illumination of AM 1.5G, 100 mW cm<sup>-2</sup>.

| annealing temperature<br>(°C) | $V_{oc}$<br>(V) | $J_{sc}$<br>(mA cm <sup>-2</sup> ) | FF<br>(%) | PCE<br>(%) |
|-------------------------------|-----------------|------------------------------------|-----------|------------|
| 70                            | 0.847           | 24.99                              | 71.10     | 15.04      |
| 85                            | 0.845           | 26.12                              | 73.65     | 16.26      |
| 100                           | 0.821           | 25.91                              | 73.87     | 15.71      |
| 110                           | 0.815           | 26.18                              | 71.85     | 15.33      |

**Table S4.** Photovoltaic performance parameters of the  $\alpha$ -PBQ10:Y6:ICBA based PSCs with different ICBA weight ratios under the illumination of AM 1.5G, 100 mW cm<sup>-2</sup>.

| $\alpha$ -PBQ10:Y6:ICBA | $V_{oc}$<br>(V) | $J_{sc}$<br>(mA cm <sup>-2</sup> ) | FF<br>(%) | PCE<br>(%) |
|-------------------------|-----------------|------------------------------------|-----------|------------|
| 1:1.2:0.15              | 0.846           | 26.45                              | 74.96     | 16.77      |
| 1:1.2:0.3               | 0.851           | 25.46                              | 73.03     | 15.82      |
| 1:1.2:0.4               | 0.842           | 24.94                              | 71.92     | 15.10      |
| 1:1:0.2                 | 0.857           | 24.22                              | 71.10     | 14.75      |

**Table S5.** The hole ( $\mu_h$ ) and electron ( $\mu_e$ ) mobilities of the binary and ternary PSCs.

| Device                  | $\mu_h$<br>(cm <sup>2</sup> V <sup>-1</sup> s <sup>-1</sup> ) | $\mu_e$<br>(cm <sup>2</sup> V <sup>-1</sup> s <sup>-1</sup> ) | $\mu_h/\mu_e$ |
|-------------------------|---------------------------------------------------------------|---------------------------------------------------------------|---------------|
| PBQ10:Y6                | $5.32 \times 10^{-4}$                                         | $3.71 \times 10^{-4}$                                         | 1.43          |
| $\alpha$ -PBQ10:Y6      | $5.38 \times 10^{-4}$                                         | $4.14 \times 10^{-4}$                                         | 1.29          |
| $\alpha$ -PBQ10:Y6:ICBA | $5.48 \times 10^{-4}$                                         | $5.30 \times 10^{-4}$                                         | 1.03          |

## References

- (1) Zhang, M.; Guo, X.; Ma, W.; Ade, H.; Hou, J. A Large-Bandgap Conjugated Polymer for Versatile Photovoltaic Applications with High Performance. *Adv. Mater.* **2015**, 27, 4655-4660.
- (2) Huang, J.; Peng, R.; Xie, L.; Song, W.; Hong, L.; Chen, S.; Wei, Q.; Ge, Z. A Novel Polymer Donor Based on Dithieno[2,3-*d*:2',3'-*d'*]benzo[1,2-*b*:4,5-*b'*]dithiophene for Highly Efficient Polymer Solar Cells. *J. Mater. Chem. A* **2019**, 7, 2646-2652.
- (3) Xu, S.; Wang, X.; Feng, L.; He, Z.; Peng, H.; Cimrova, V.; Yuan, J.; Li, Y.; Zou, Y. Optimizing Conjugated Side Chains on Quinoxaline Based Polymers for Nonfullerene Solar Cells with 10.5% Efficiency. *J. Mater. Chem. A* **2018**, 6, 3074-3083.
- (4) Sun, C.; Pan, F.; Qiu, B.; Qin, S.; Chen, S.; Shang, Z.; Meng, L.; Yang, C.; Li, Y. D-A Copolymer Donor Based on Bithienyl Benzodithiophene D-Unit and Monoalkoxy Bifluoroquinoxaline A-Unit for High-Performance Polymer Solar Cells. *Chem. Mater.* **2020**, 32, 3254-3261.
- (5) Weigend, F.; Ahlrichs, R. Balanced Basis Sets of Split Valence, Triple Zeta Valence and Quadruple Zeta Valence Quality for H to Rn: Design and Assessment of Accuracy. *Phys. Chem. Chem. Phys.* **2005**, 7, 3297-3305.
- (6) Weigend, F. Accurate Coulomb-Fitting Basis Sets for H to Rn. *Phys. Chem. Chem. Phys.* **2006**, 8, 1057-1065.
- (7) Humphrey, W.; Dalke, A.; Schulten, K. VMD: Visual Molecular Dynamics. *J. Mol. Graphics* **1996**, 14, 33-38.
- (8) Lu, T.; Chen, F. Multiwfn: A Multifunctional Wavefunction Analyzer. *J. Comput. Chem.* **2012**, 33, 580-592.
